# Supplementary material for: Melittin Tryptophan Substitution with a Fluorescent Amino Acid Reveals the Structural Basis of Selective Antitumor Effect and Subcellular Localization in Tumor Cells
Source: MDPI journal article supplement (doi:10.3390/toxins14070428), 2022-06-22

---

*Supplementary Materials*

# **Melittin Tryptophan Substitution with a Fluorescent Amino Acid Reveals the Structural Basis of Selective Antitumor Effect and Subcellular Localization in Tumor Cells**

Yonghui Lv, Xu Chen, Zhidong Chen, Zhanjun Shang, Yongxiao Li, Wanting Xu, Yuan Mo  
Xinpei Wang, Daiyun Xu, Shengbin Li, Zhe Wang, Meiying Wu and Junqing Wang

**Figure S1. (a)** Mass spectra analyse of Melittin. MS characterization: M.W. = 2846.53 Da; found: 2846.73 Da. **(b)** Identifications of peaks in the HPLC chromatogram. The Melittin, which eluted with 1 mL/min, injection volume: 10  $\mu$ L, detection wavelength: 220 nm, purity: 99.03%.

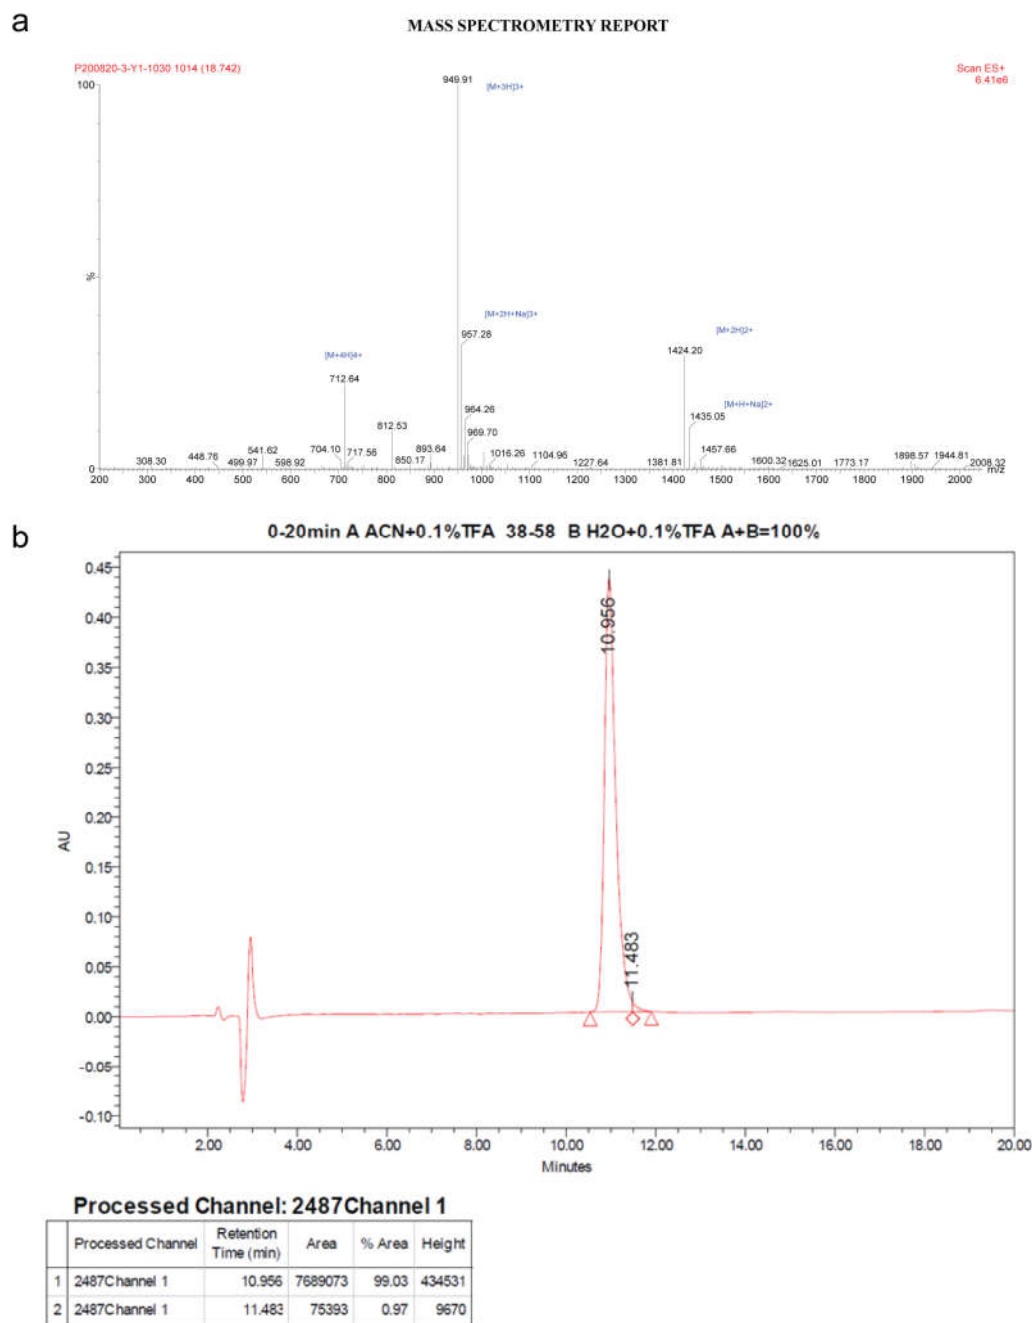

**Figure S2.** (a) Mass spectra analyse of MEL<sup>FL</sup>. MS characterization: M.W. = 2962 Da; found: 2961.2 Da. (b) Identifications of peaks in the HPLC chromatogram of MEL<sup>FL</sup>, which eluted with 1 mL/min, injection volume: 10  $\mu$ L, detection wavelength: 220 nm, purity: 99.62%.

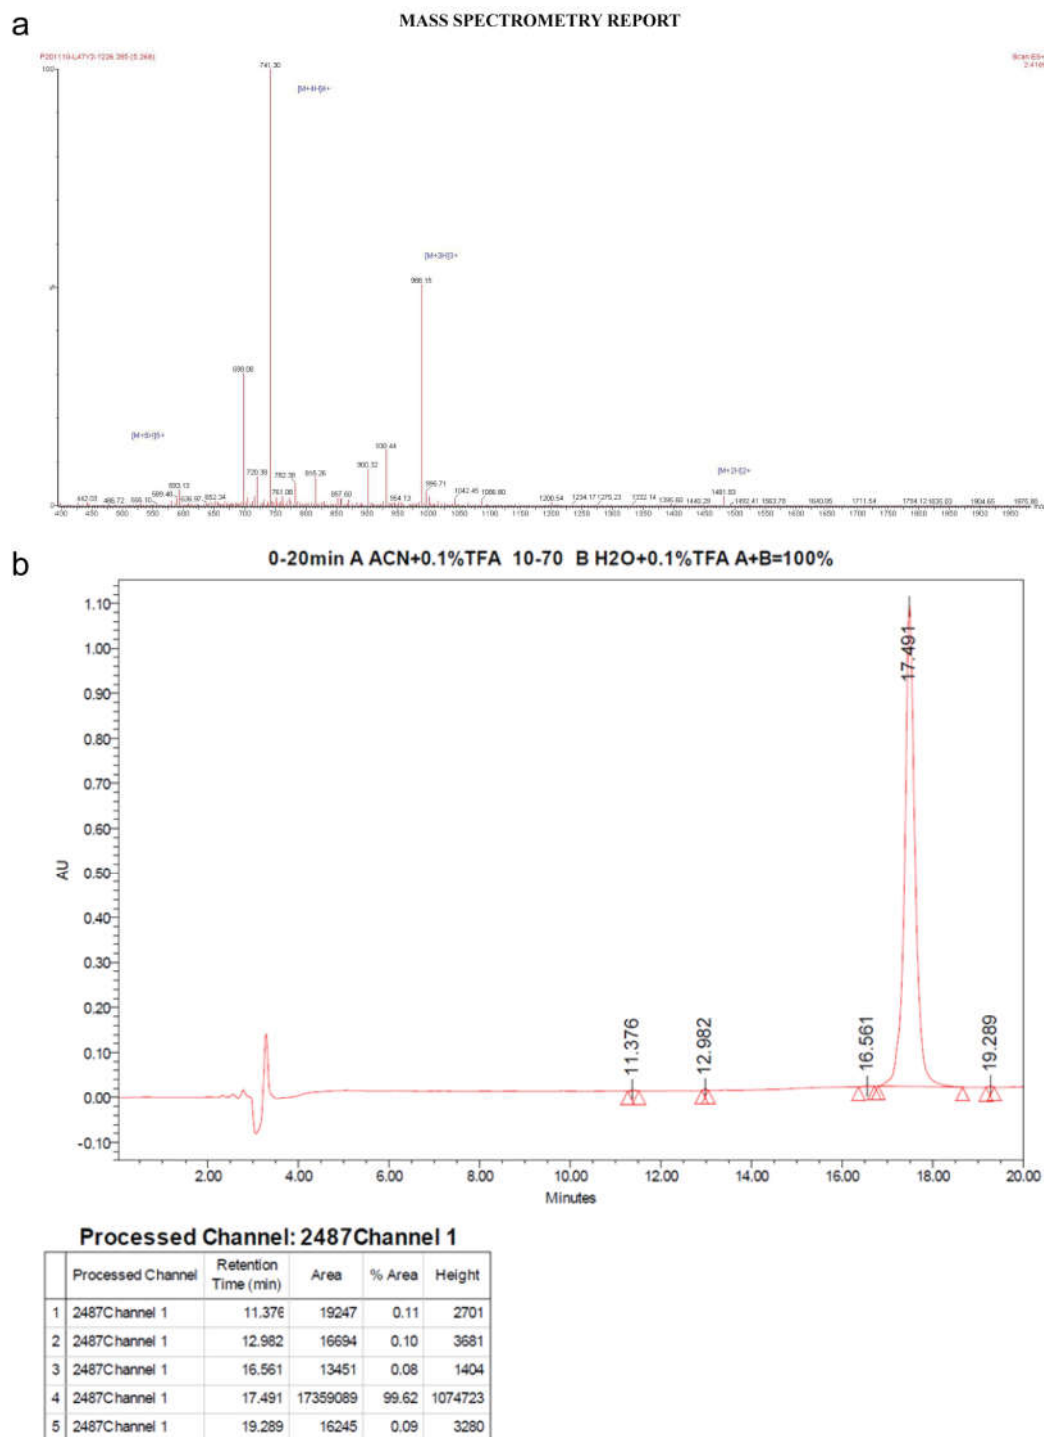

Supplement: s1 [file s1]
